# Supplementary material for: Comparison of the Pipeline embolisation device alone or combined with coiling for treatment of different sizes of intracranial aneurysms
Source: HighWire-hosted journal article supplement (doi:10.1136/svn-2021-001258), 2022-04-06
Supplement: svn-2021-001258supp001_data_supplement.pdf [file svn-2021-001258supp001_data_supplement.pdf]

**Supplement Table 1.** Patient demographics and clinical characteristics

|                                                      |                  |
|------------------------------------------------------|------------------|
| Number of patients                                   | n = 1171         |
| Gender                                               |                  |
| Male                                                 | 358/1171(30.4%)  |
| Female                                               | 813/1171(69.6%)  |
| Age (year mean)                                      | 53.9±11.4        |
| Co-morbidities                                       |                  |
| Hypertension                                         | 397/1171(33.9%)  |
| Diabetes                                             | 63/1171(5.4%)    |
| Hyperlipidemia                                       | 42/1171(3.6%)    |
| Coronary heart disease                               | 67/1171(5.7%)    |
| Alcohol abuse                                        | 144/1171(12.3%)  |
| Smoking                                              | 308/1171(26.3%)  |
| Aneurysm Presentation                                |                  |
| Incidental                                           | 425/1171(36.3%)  |
| Symptomatic                                          | 704/1171(60.1%)  |
| Ruptured (history of SAH)                            | 42/1171(3.2%)    |
| Pretreatment mRS                                     |                  |
| ≤2                                                   | 1060/1171(90.5%) |
| > 2                                                  | 111/1171(9.5%)   |
| Blood thinners                                       |                  |
| Pre-PED implant dual-antiplatelet therapy >3 days    | 915/1171 (78.1%) |
| Post-PED implant dual-antiplatelet therapy >6 months | 676/1171 (57.7%) |
| mRS score at follow-up                               |                  |
| ≤2                                                   | 1111/1171(94.9%) |
| > 2                                                  | 60/1171(5.1%)    |

**Abbreviations: PED: Pipeline embolization device embolization****SAH: Subarachnoid hemorrhage****Supplement Table 2.** Aneurysm characteristics

|                             |                   |
|-----------------------------|-------------------|
| Number of treated aneurysms | n= 1322           |
| Morphology                  |                   |
| Saccular                    | 1099/1322 (83.1%) |
| Fusiform                    | 109/1322 (8.2%)   |
| Dissecting                  | 83/1322 (6.3%)    |
| Blister                     | 31/1322 (2.3%)    |
| Maximal diameter in mm      | 12.79±8.75        |
| ≤7mm                        | 436/1322 (33.0%)  |
| 7-15mm                      | 470/1322 (45.6%)  |

|                                                |                   |
|------------------------------------------------|-------------------|
| >15mm                                          | 416/1322 (31.4%)  |
| Aneurysm location                              |                   |
| Carotid artery                                 | 1105/1322 (83.6%) |
| Distal Circle of Willis                        | 48/1322 (3.6%)    |
| Vertebral artery                               | 133/1322 (10.1%)  |
| Basilar artery and other posterior circulation | 36/1322 (2.7%)    |
| Previous treatment                             | 33/1322 (2.5%)    |
| Coiling                                        | 11/33 (33.3%)     |
| Stent assistant coiling                        | 22/33 (66.7%)     |
| Clipping                                       | 2/33 (6.1%)       |

**Supplement Table 3.** Procedure details, complications, and outcomes

|                                                                                        |                   |
|----------------------------------------------------------------------------------------|-------------------|
| Procedure details                                                                      | n = 1322          |
| Treatment modality                                                                     |                   |
| PED alone                                                                              | 685/1322 (51.8%)  |
| PED adjunctive coiling                                                                 | 637/1322 (48.2%)  |
| Loose packing                                                                          | 504/637 (79.1%)   |
| Dense packing                                                                          | 133/637 (20.9%)   |
|                                                                                        |                   |
| PED Model                                                                              |                   |
| PED Classic                                                                            | 596/1319 (45.2%)  |
| PED Flex                                                                               | 723/1319 (54.8%)  |
|                                                                                        |                   |
| Multiple aneurysms treated with one PED                                                | 178/1322 (13.5%)  |
| Patients with multiple PED                                                             | 75/1322 (5.7%)    |
| Device deployment to target site                                                       |                   |
| Successful                                                                             | 1241/1319 (94.1%) |
| Successful after adjustment                                                            | 68/1319 (5.1%)    |
| Failed                                                                                 | 10/1319 (0.8%)    |
| Number of covered collateral arteries                                                  | 927/1322 (70.1%)  |
| Status of covered collateral arteries                                                  |                   |
| Patency                                                                                | 627/927 (67.6%)   |
| Stenosis                                                                               | 54/927 (5.9%)     |
| Occlusion                                                                              | 26/927 (2.8%)     |
| Parent artery status                                                                   |                   |
| Patency                                                                                | 1211/1322 (91.6%) |
| Stenosis                                                                               | 93/1322 (7.0%)    |
| Occlusion                                                                              | 18/1322 (1.4%)    |
| Last radiographic follow-up time, months (mean; IQR) (exclude the perioperative death) | 8.96±7.50         |

|                                                      |                 |
|------------------------------------------------------|-----------------|
| Imaging follow-up                                    | 967/1322(73.1%) |
| Occluded or near completely occluded (90-100%)       | 789(81.6%)      |
| Incompletely occluded (<90%)                         | 178(18.4%)      |
| Recurrence                                           | 0               |
| Thromboembolic complications                         | 85/1171(7.3%)   |
| Perioperative period                                 | 74/85(87.1%)    |
| Cerebral infarction                                  | 44/74(59.5%)    |
| TIA/minor stroke                                     | 30/74(40.5%)    |
| Follow-up period                                     | 11/85(12.9%)    |
| Cerebral infarction                                  | 7/11(63.6%)     |
| TIA/minor stroke                                     | 4/11(36.4%)     |
| Hemorrhagic complications                            | 47/1171 (4.0%)  |
| perioperative period                                 | 46/47 (97.9%)   |
| DAR                                                  | 23/46(50%)      |
| DIPH                                                 | 23/46(50%)      |
| Follow-up period                                     | 1/47(2.1%)      |
| DAR                                                  | 1/1(100%)       |
| DIPH                                                 | 0               |
| Other Procedure and medication related complications |                 |
| Neurological compressive symptoms                    | 51/1171 (4.4%)  |
| Death                                                | 18/1171 (1.5%)  |
| perioperative period                                 | 15/18 (83.3%)   |
| follow-up                                            | 3/18 (16.7%)    |

**Abbreviations:** PED: Pipeline embolization device embolization

**DAR:** Delayed aneurysm rupture

**DICH:** Distal intraparenchymal hemorrhage

**TIA:** Transient ischemic attack

**Supplement Table 4.** Comparison of the PED alone and PED combined with coiling groups after 1:1 propensity score matching

| Variable               |               |               |       |
|------------------------|---------------|---------------|-------|
| No. of aneurysms (%)   | 304           | 304           |       |
| Age (years)            |               |               |       |
| Mean (SD)              | 53.24(±11.73) | 52.79(±12.07) | 0.714 |
| Female                 | 225 (74.0%)   | 233 (72.4%)   | 0.714 |
| Co-morbidities         |               |               |       |
| Hypertension           | 97(31.9%)     | 96 (31.2%)    | 1     |
| Diabetes               | 10(3.3%)      | 19(6.2%)      | 0.128 |
| Hyperlipidemia         | 8(2.6%)       | 7(2.3%)       | 0.811 |
| Coronary heart disease | 13(4.3%)      | 12(3.9%)      | 1     |

|                                                |               |               |                   |
|------------------------------------------------|---------------|---------------|-------------------|
| Alcohol abuse                                  | 36(11.8%)     | 39(12.8%)     | 0.835             |
| Smoking                                        | 68(22.4%)     | 66(25.0%)     | 0.504             |
| Aneurysm Presentation                          |               |               | 0.208             |
| Incidental                                     | 150 (49.3%)   | 131 (43.1%)   | 0.143             |
| Symptomatic                                    | 140 (46.1%)   | 162 (53.3%)   | 0.088             |
| Ruptured (history of SAH)                      | 14 (4.6%)     | 11 (3.6%)     | 0.684             |
| Pretreatment mRS                               |               |               | 1                 |
| ≤ 2                                            | 296(90.4%)    | 280(89.1)     |                   |
| > 2                                            | 36(9.6%)      | 33(10.9%)     |                   |
| Multiple aneurysms                             | 90 (29.6%)    | 99 (32.6%)    | 0.422             |
| Ruptured aneurysms                             | 14 (4.6%)     | 11 (3.6%)     | 0.683             |
| morphology                                     |               |               | 0.152             |
| Saccular                                       | 257 (84.5%)   | 264(86.8%)    | 0.487             |
| Fusiform                                       | 25 (8.2%)     | 24 (7.9%)     | 1                 |
| Dissecting                                     | 19 (6.2%)     | 9 (3.0%)      | 0.08              |
| Blister                                        | 3 (1.0%)      | 7 (2.3%)      | 0.34              |
| Maximal diameter in mm (mean)                  | 11.81 (±8.18) | 12.35 (±7.52) | 0.409             |
| ≤ 7mm                                          | 110 (36.2%)   | 98 (32.2%)    | 0.305             |
| ≤ 15 mm to > 7 mm                              | 144 (47.4%)   | 145 (47.1%)   | 0.935             |
| > 15mm                                         | 50 (16.4%)    | 61 (20.1%)    | 0.248             |
| Location                                       |               |               | 0.096             |
| Carotid artery                                 | 253(83.2%)    | 261 (85.9%)   | 0.432             |
| Distal Circle of Willis                        | 13(4.3%)      | 10 (3.3%)     | 0.672             |
| Vertebral artery                               | 34 (11.2%)    | 22 (7.2%)     | 0.122             |
| Basilar artery and other posterior circulation | 4 (1.3%)      | 11 (3.6%)     | 0.114             |
| PED Model                                      |               |               | 0.371             |
| PED Classic                                    | 136(44.7%)    | 148(48.7%)    |                   |
| PED Flex                                       | 168 (55.3%)   | 156 (51.3%)   |                   |
| Time to last follow-up imaging (mean)          | 9.01 (±654)   | 8.75 (±767)   | 0.649             |
| Complete occlusion at last follow-up           | 228 (75.0%)   | 272 (89.5%)   | <b>&lt; 0.001</b> |
| mRS score at last follow-up                    |               |               | 0.335             |
| ≤ 2                                            | 289(92.0%)    | 281(89.5%)    |                   |
| > 2                                            | 25 (8.0%)     | 33 (10.5%)    |                   |
| Complications                                  |               |               |                   |
| Ischemic complications                         | 18 (5.9%)     | 34 (11.2%)    | <b>0.03</b>       |
| Hemorrhagic complications                      | 6 (2.0%)      | 8 (2.6%)      | 0.787             |
| Compression symptoms                           | 5 (1.6%)      | 12(3.9%)      | 0.140             |
| Mortality                                      | 6 (2.0%)      | 5 (1.6%)      | 1.0               |

**Bold values: P-Value < .05.**

**n (%); P-Value: chi-square test.**

**Median (IQR); P-Value: T test**

**Abbreviations: PED: Pipeline embolization device embolization**  
**SAH: Subarachnoid hemorrhage**
